# Supplementary material for: C. elegans MRP-5 Exports Vitamin B12 from Mother to Offspring to Support Embryonic Development
Source: PubMed Central journal article supplement — Cell Rep. Author manuscript; Available in PMC 2018 Apr 12. (PMC5896776; doi:10.1016/j.celrep.2018.02.100), 2018-03-20
Supplement: NIHMS955391-supplement-1.pdf [file NIHMS955391-supplement-1.pdf]

Cell Reports, Volume 22

**Supplemental Information**

***C. elegans* MRP-5 Exports Vitamin B12  
from Mother to Offspring  
to Support Embryonic Development**

**Huimin Na, Olga Ponomarova, Gabrielle E. Giese, and Albertha J.M. Walhout**

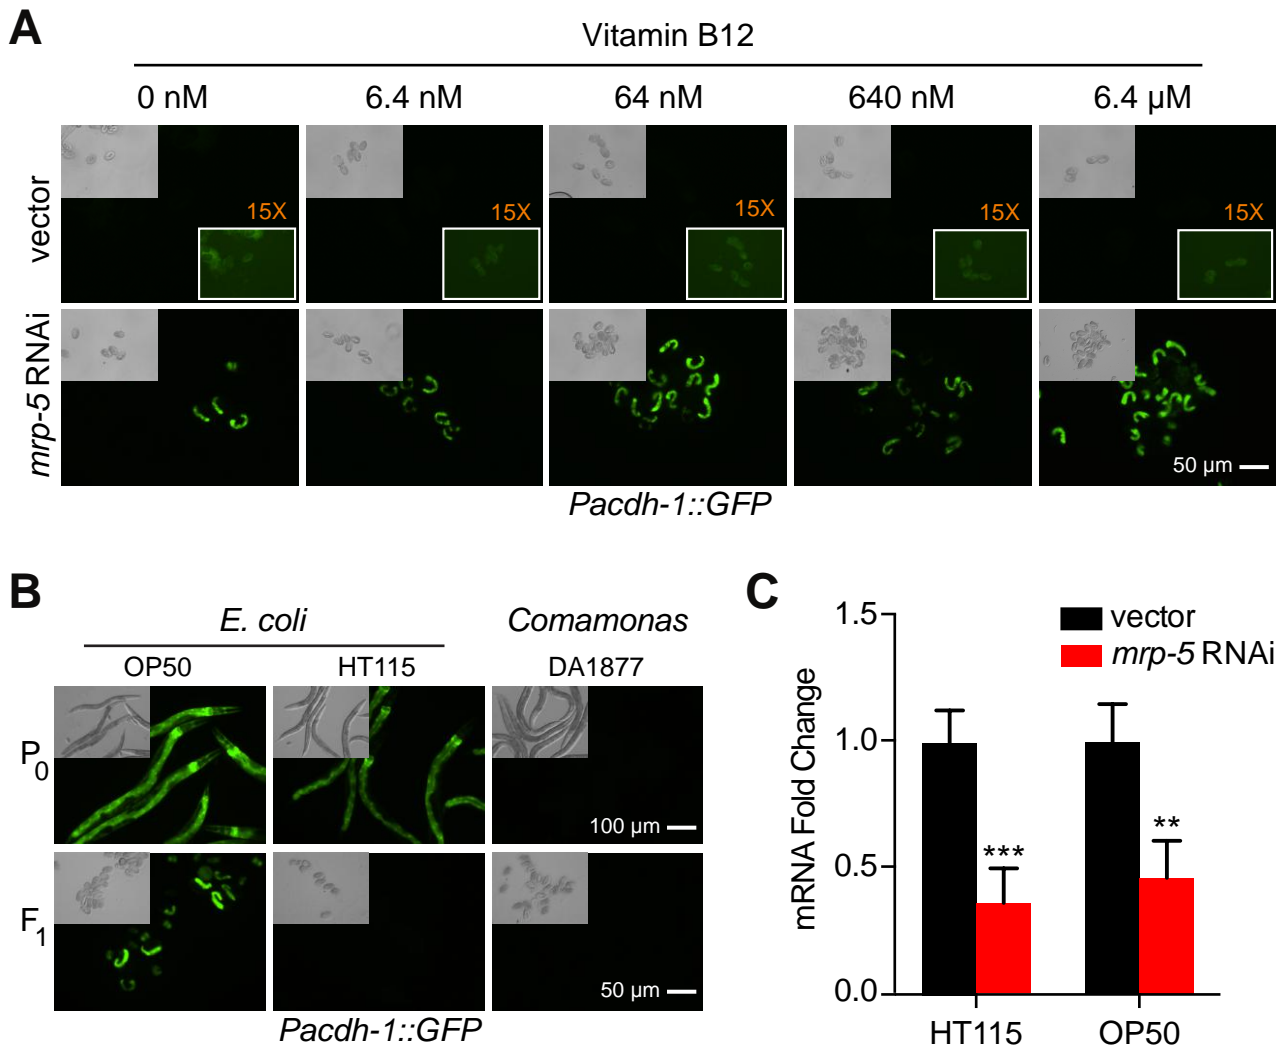

**Figure S1. RNAi of *mrp-5* retains vitamin B12 in the intestine of P0 mothers, Related to Figure 1.**

(A) Fluorescence and DIC microscopy images of embryos from *Pacdh-1::GFP* mothers subjected to vector control RNAi or *mrp-5* RNAi in *E. coli* HT115 and supplemented with increasing concentrations of vitamin B12. In the upper row, the inset box in the lower right indicates 15 times the exposure time. Scale bar, 50  $\mu$ m.

(B) Fluorescence and DIC microscopy images of *Pacdh-1::GFP* animals fed *E. coli* OP50, *E. coli* HT115 or *C. aquatica* DA1877 at P0 and F1 generations. Scale bars, 50  $\mu$ m for embryos and 100  $\mu$ m for adults.

(C) RT-qPCR of *mrp-5* showing similar RNAi efficiency in *E. coli* HT115 and *E. coli* OP50-fed animals relative to vector control. Error bars represent standard deviation. The p value was determined by unpaired student's t-test (\*\*\*) p < 0.0001, \*\* p < 0.0005).

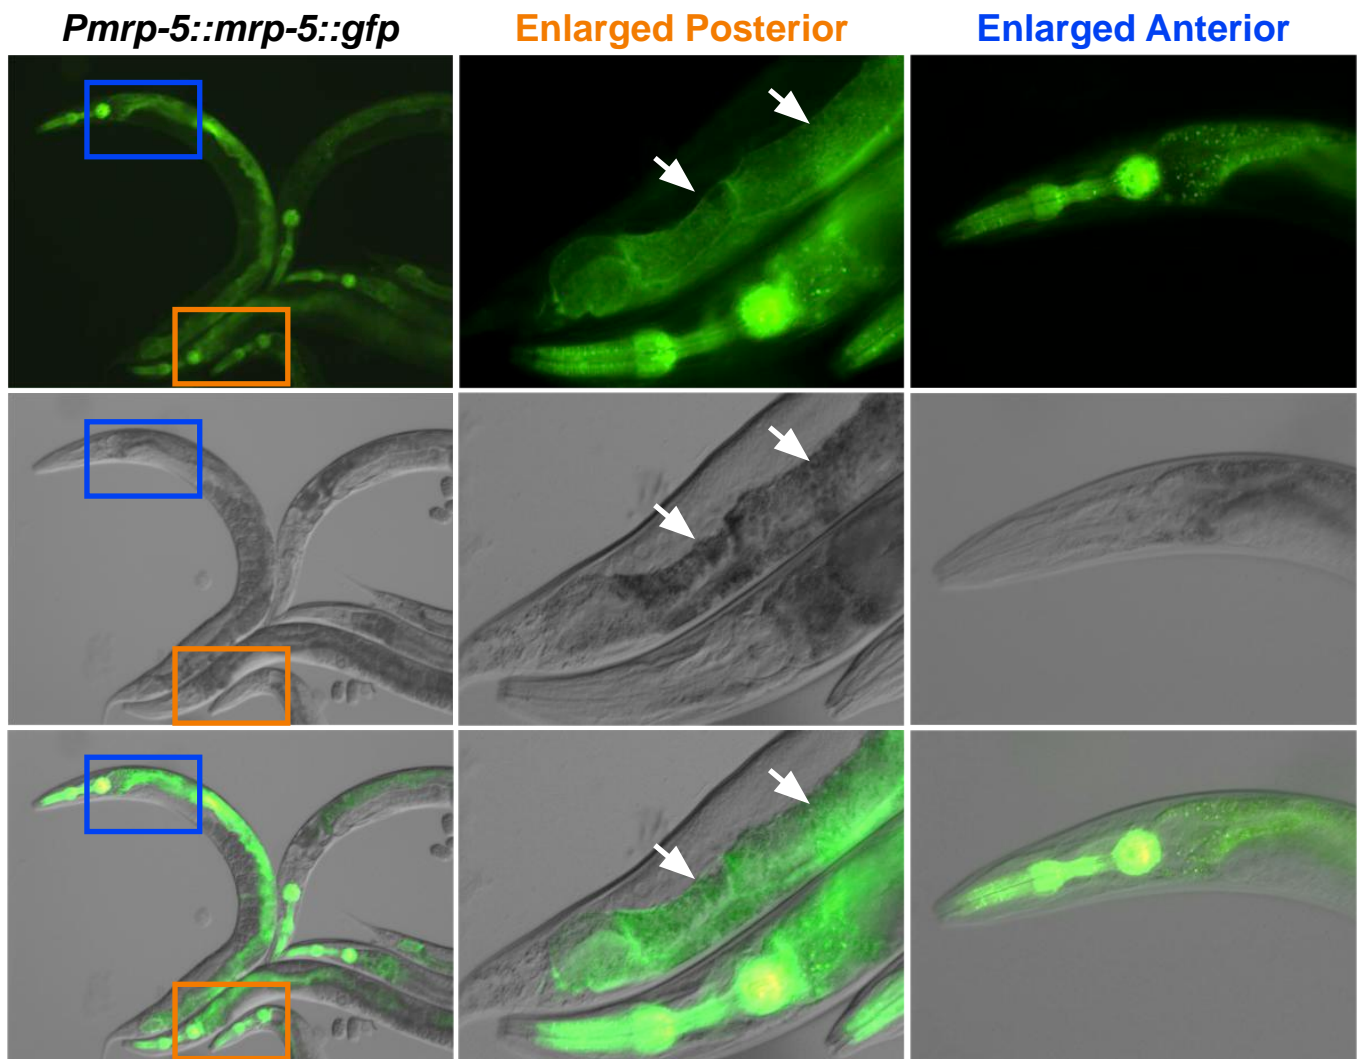

**Figure S2. MRP-5 is expressed in the intestine, Related to Figure 1.**

Fluorescence (top), DIC (middle), and overlay (bottom) microscopy images of GFP expression in *Pmrp-5::mrp-5::GFP* transgenic animals. The white arrowheads in the middle panels indicate intestinal cells.

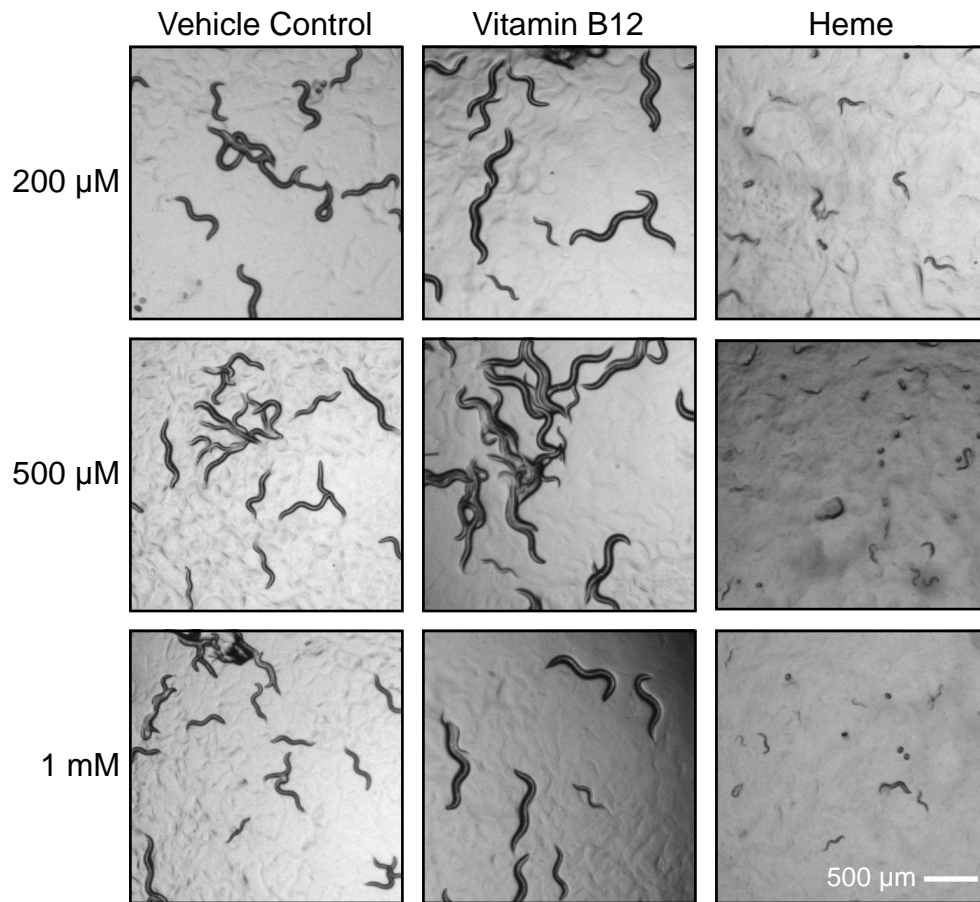

**Figure S3. High doses of heme cause arrest at the L1-L2 stage, while high doses of vitamin B12 does not affect development, Related to Figure 3.**

Bright field microscopy images of feeding various concentrations of heme, vitamin B12, or vehicle control (water) to wild type mothers on *E. coli* OP50 demonstrates viable offspring while developing on vitamin B12 or vehicle control, but causes larval arrest and toxicity in heme fed mothers. Scale bar, 500  $\mu$ m.

## RESOURCE TABLE

| REAGENT or RESOURCE                                                                                                                                                   | SOURCE                                                                                      | IDENTIFIER               |
|-----------------------------------------------------------------------------------------------------------------------------------------------------------------------|---------------------------------------------------------------------------------------------|--------------------------|
| <b>Chemicals and Commercial Assays</b>                                                                                                                                |                                                                                             |                          |
| Adenosyl Cobalamin                                                                                                                                                    | Sigma Aldrich                                                                               | Cat#: C0884              |
| Hemin                                                                                                                                                                 | Sigma Aldrich                                                                               | Cat#: H9039              |
| Glass beads                                                                                                                                                           | Sigma Aldrich                                                                               | Cat#: G1277              |
| Methoxyamine hydrochloride                                                                                                                                            | Sigma Aldrich                                                                               | Cat#: 226904             |
| N-Methyl-N-(trimethylsilyl)trifluoroacetamide                                                                                                                         | Sigma Aldrich                                                                               | Cat#: 69479              |
| Isopropyl $\beta$ -D-1 thiogalactopyranoside (IPTG)                                                                                                                   | US Biological                                                                               | Cat#: I8500              |
| TRIzol Reagent                                                                                                                                                        | Invitrogen                                                                                  | Cat#: 15596026           |
| M-MuLV Reverse Transcriptase                                                                                                                                          | NEB                                                                                         | Cat#: M0253S             |
| Fast SYBR Green Master Mix                                                                                                                                            | Thermo Fisher Scientific                                                                    | Cat#: 4385612            |
| RNeasy Mini Kit                                                                                                                                                       | Qiagen                                                                                      | Cat#: 74104              |
| Bridge-It® S-Adenosyl Methionine (SAM) Fluorescence Assay Kit                                                                                                         | Mediomics, LLC                                                                              | Cat#: SKU: 1-1-1003      |
| <b>Experimental Models: Organisms/Strains</b>                                                                                                                         |                                                                                             |                          |
| <i>Caenorhabditis elegans</i> N2                                                                                                                                      | Caenorhabditis Genetics Center (CGC); <a href="http://cgc.umn.edu/">http://cgc.umn.edu/</a> | N/A                      |
| <i>C. elegans</i> , wwIs24 [ <i>acdh-1p::GFP + unc-119(+)</i> ]                                                                                                       | Arda <i>et al.</i> , 2010                                                                   | Strain VL749             |
| <i>C. elegans</i> , wwSi1 [ <i>acdh-1p::GFP::H2B + unc-119(+)</i> II; <i>avr-14(ad1302)</i> I; <i>unc-119(ed3)</i> III; <i>avr-15(ad1051)</i> ; <i>glc-1(pk54)</i> V] | This study                                                                                  | Strain VL1168            |
| <i>C. elegans</i> , +/szT1 [ <i>lon-2(e678)</i> I; <i>mrp-5(ok2067)/szT1</i> X]                                                                                       | CGC                                                                                         | Strain VL1599            |
| <i>C. elegans</i> , wwIs47 [ <i>mrp5p::MRP-5::GFP + rol-6(+)</i> ]                                                                                                    | This study                                                                                  |                          |
| <i>Escherichia coli</i> OP50                                                                                                                                          | CGC                                                                                         | N/A                      |
| <i>Escherichia coli</i> HT115                                                                                                                                         | CGC                                                                                         | N/A                      |
| <i>Escherichia coli</i> OP50 RNAi compatible                                                                                                                          | Xiao <i>et al.</i> , 2015                                                                   | N/A                      |
| <i>Comamonas aquatic</i> DA1877                                                                                                                                       | CGC                                                                                         | N/A                      |
| <i>Escherichia coli</i> HT115 Ahringer RNAi Library                                                                                                                   | Kamath <i>et al.</i> , 2003                                                                 | N/A                      |
| <i>Escherichia coli</i> HT115 ORFeome RNAi Library                                                                                                                    | Reboul <i>et al.</i> , 2001                                                                 | N/A                      |
| <b>Oligonucleotides</b>                                                                                                                                               |                                                                                             |                          |
| <i>mrp-5</i> qPCR forward                                                                                                                                             | This study                                                                                  | GACTGTCAGG<br>GGGCTACCTA |

|                                                      |                          |                          |
|------------------------------------------------------|--------------------------|--------------------------|
| <i>mrp-5</i> qPCR reverse                            | This study               | AACAGCTCCAA<br>TAACCGCGA |
| <i>ama-1</i> qPCR forward                            | This study               | CGGATGGAGG<br>AGCATCGCCG |
| <i>ama-1</i> qPCR reverse                            | This study               | CAGCGGCTGG<br>GGAAGTTGGC |
| <b>Software, Algorithms and Instruments</b>          |                          |                          |
| Eclipse Ti Inverted Microscope                       | Nikon                    | N/A                      |
| Eclipse 90i Inverted Microscope                      | Nikon                    | N/A                      |
| SpeedVac concentrator<br>SPD111V                     | Thermo Fisher Scientific | N/A                      |
| FastPrep-24 bead beater                              | MP Biomedicals           | Cat#: 116004500          |
| ImageJ                                               | NIH                      | N/A                      |
| StepOnePlus Real-Time PCR<br>System                  | Applied Biosystems       | Cat#: 4376600            |
| DS Ri1 Camera                                        | Nikon                    | N/A                      |
| EVOS FL Auto Imaging System                          | Invitrogen               | N/A                      |
| FemtoJet <sup>®</sup> 4i electronic<br>microinjector | Eppendorf                | N/A                      |
| 7890B/5977B quadrupole GC-<br>MS                     | Agilent                  | N/A                      |
| Microinjection Arm                                   | Narishige                | N/A                      |
